# Supplementary figures and images for: Comparative transcriptomic analysis and mechanistic characterization revealed the use of formononetin for bladder cancer treatment
Source: Royal Society of Chemistry journal article supplement (doi:10.1039/d2fo03962a), 2023-01-01

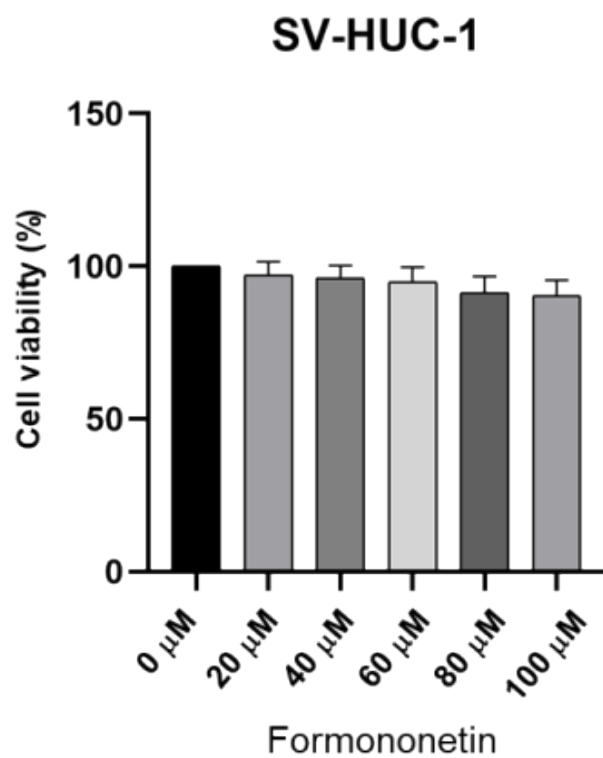

Supplement: d2fo03962a1.pdf [file d2fo03962a1.pdf]
